# Supplementary material for: Exploring the upper pH limits of nitrite oxidation: diversity, ecophysiology, and adaptive traits of haloalkalitolerant Nitrospira
Source: PubMed Central journal article supplement (PMC7784846; doi:10.1038/s41396-020-0724-1), 2020-07-24
Supplement: 41396_2020_724_MOESM7_ESM.pdf [file 41396_2020_724_MOESM7_ESM.pdf]

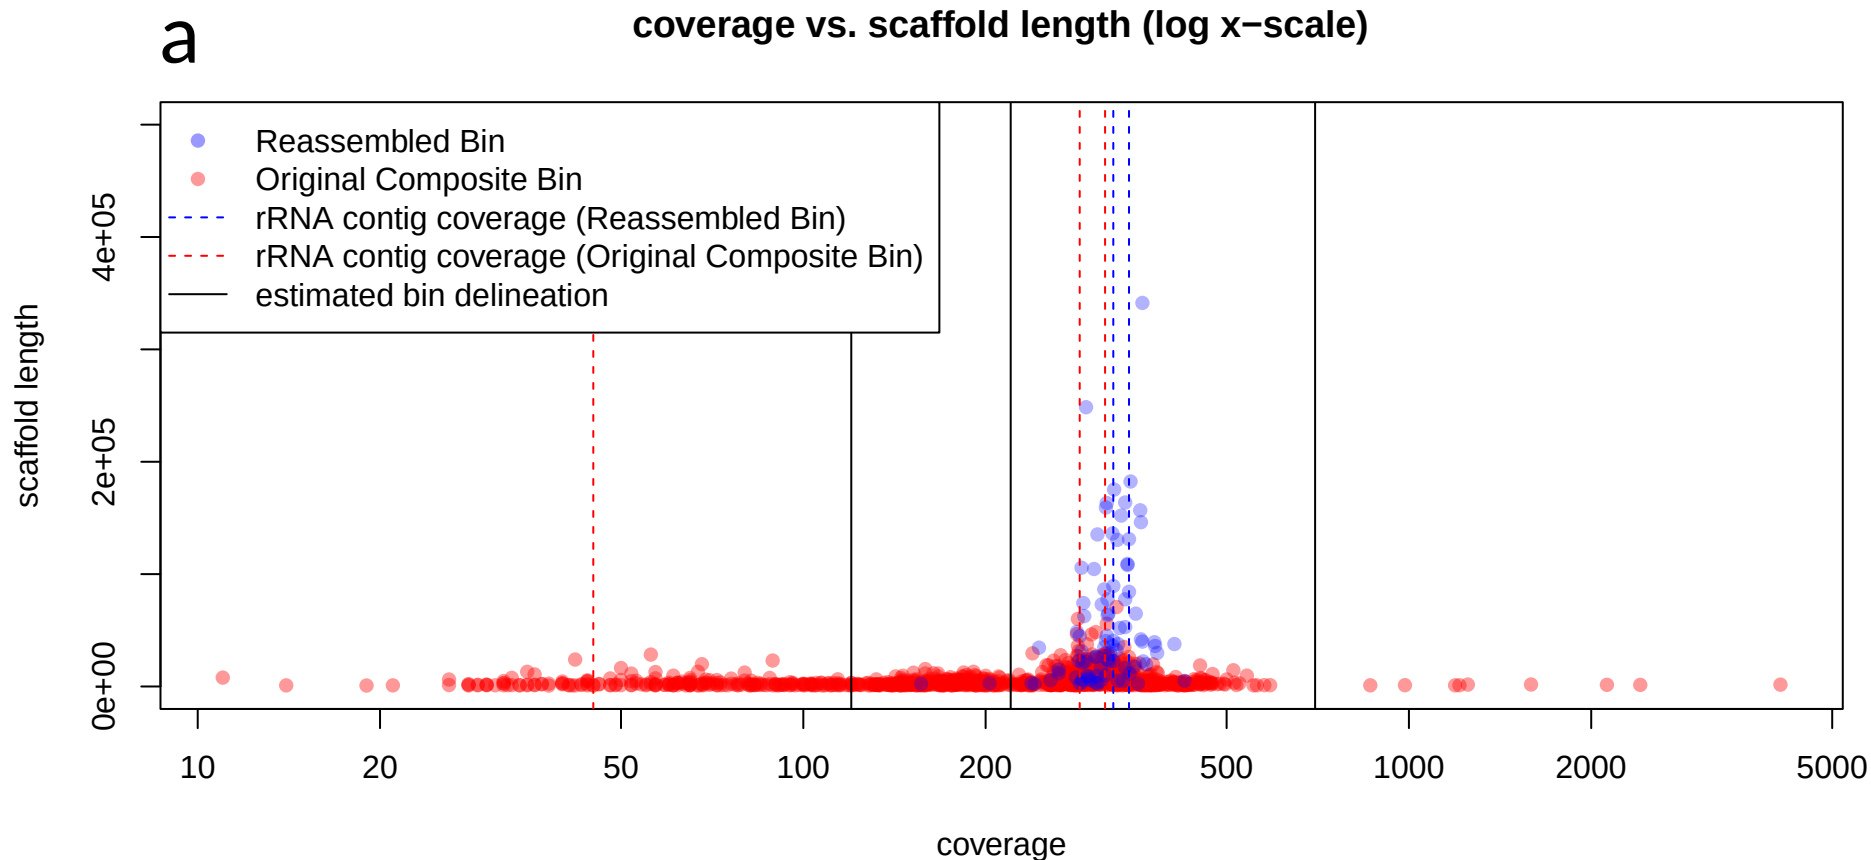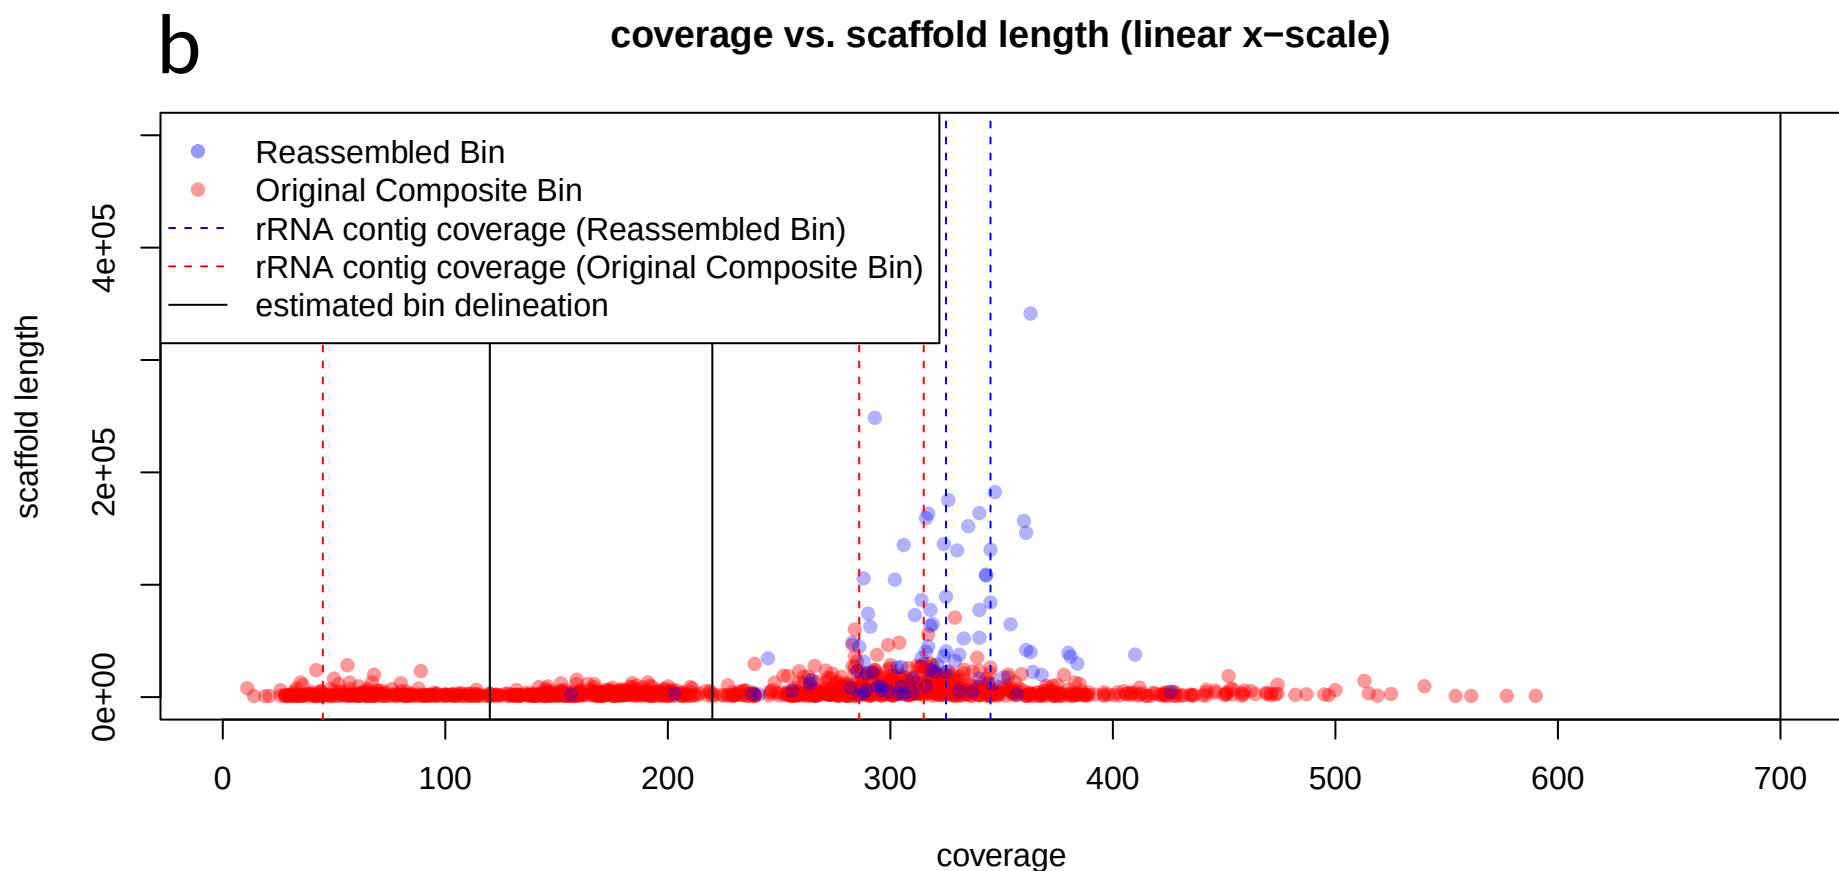

**Figure S6** Median base coverage and scaffold length of scaffolds in original *Nitrospira* MAG and the re-assembled “*Ca. N. alkalitolerans*” MAG from Illumina MiSeq sequencing of the “*Ca. N. alkalitolerans*” enrichment culture. Scaffold length (x-axis) is shown in log-scale in (a) and linear scale in (b). Contigs with coverage values of 220 – 700 were binned and re-assembled as the “*Ca. Nitrospira alkalitolerans*” MAG, while contigs with coverage values of 120 – 220 and < 120 were binned into *Nitrospira* bin1 and bin2, respectively (see also Table S1).
