# Supplementary material for: Exploring the upper pH limits of nitrite oxidation: diversity, ecophysiology, and adaptive traits of haloalkalitolerant Nitrospira
Source: PubMed Central journal article supplement (PMC7784846; doi:10.1038/s41396-020-0724-1), 2020-07-24
Supplement: 41396_2020_724_MOESM9_ESM.pdf [file 41396_2020_724_MOESM9_ESM.pdf]

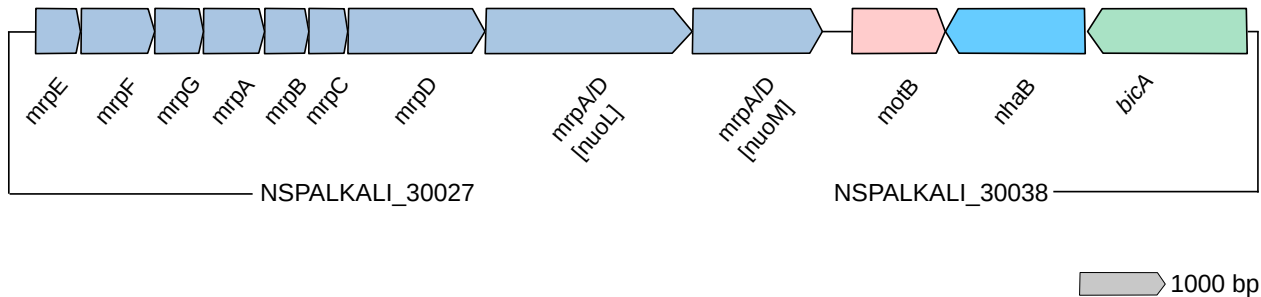

- Mrp-like sodium/ proton antiporter complex
- Flagellar motor component
- Sodium/ proton antiporter
- Bicarbonate transporter

**Figure S8** Schematic illustration of one of the genomic loci with a Mrp-like sodium/proton antiporter (*mrpA-E*) in “*Ca. N. alkalitolerans*”. Two additional putative MrpA or MrpD subunits display sequence similarity to the complex I subunits NuoL and NuoM, respectively. Genes are drawn to scale.
