# Supplementary material for: Exploring the upper pH limits of nitrite oxidation: diversity, ecophysiology, and adaptive traits of haloalkalitolerant Nitrospira
Source: PubMed Central journal article supplement (PMC7784846; doi:10.1038/s41396-020-0724-1), 2020-07-24
Supplement: 41396_2020_724_MOESM10_ESM.pdf [file 41396_2020_724_MOESM10_ESM.pdf]

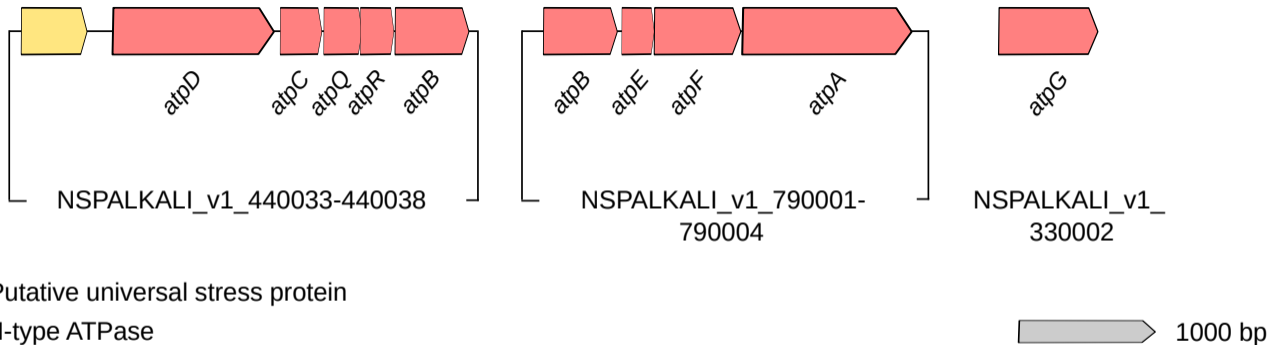

**Figure S9** Schematic illustration of the genomic loci of the N-type ATPase with genes *atpA-G* of “*Ca. N. alkalitolerans*”. Genes are drawn to scale.
