# Supplementary material for: Exploring the upper pH limits of nitrite oxidation: diversity, ecophysiology, and adaptive traits of haloalkalitolerant Nitrospira
Source: PubMed Central journal article supplement (PMC7784846; doi:10.1038/s41396-020-0724-1), 2020-07-24
Supplement: 41396_2020_724_MOESM12_ESM.pdf [file 41396_2020_724_MOESM12_ESM.pdf]

**Table S1** pH monitoring and adjustments during the pH experiments with enrichment cultures A, B and C

| Day | Treatment pH | pH measured  | pH adjusted to |
|-----|--------------|--------------|----------------|
| 0   | 7.6          | 7.63 ± 0.02  | -              |
| 3   | 7.6          | 7.86 ± 0.12  | 7.61 ± 0.02    |
| 5   | 7.6          | 7.84 ± 0.1   | 7.64 ± 0.04    |
| 8   | 7.6          | 7.78 ± 0.06  | 7.63 ± 0.01    |
| 11  | 7.6          | 7.82 ± 0.09  | 7.61 ± 0.02    |
| 15  | 7.6          | 7.75 ± 0.07  | 7.62 ± 0.03    |
| 17  | 7.6          | 7.78 ± 0.04  | 7.6 ± 0.02     |
| 22  | 7.6          | 7.82 ± 0.08  | 7.62 ± 0.01    |
| 27  | 7.6          | 7.79 ± 0.06  | 7.62 ± 0.01    |
| 31  | 7.6          | 7.76 ± 0.09  | 7.62 ± 0.02    |
| 35  | 7.6          | 7.78 ± 0.06  | 7.61 ± 0.03    |
| 0   | 9            | 9.03 ± 0.04  | -              |
| 3   | 9            | 9.02 ± 0.06  | -              |
| 8   | 9            | 9.03 ± 0.05  | -              |
| 11  | 9            | 9 ± 0.06     | -              |
| 17  | 9            | 9.02 ± 0.07  | -              |
| 27  | 9            | 9.04 ± 0.06  | -              |
| 35  | 9            | 9.02 ± 0.08  | -              |
| 0   | 10           | 10 ± 0.02    | -              |
| 2   | 10           | 9.97 ± 0.04  | -              |
| 4   | 10           | 10 ± 0.03    | -              |
| 6   | 10           | 9.99 ± 0.04  | -              |
| 9   | 10           | 9.98 ± 0.02  | -              |
| 9   | 10.5         | 10.52 ± 0.03 | -              |
| 10  | 10.5         | 10.24 ± 0.07 | 10.51 ± 0.05   |
| 11  | 10.5         | 10.49 ± 0.05 | -              |
| 14  | 10.5         | 10.36 ± 0.08 | 10.52 ± 0.02   |
| 17  | 10.5         | 10.51 ± 0.06 | -              |
| 17  | 11           | 11.02 ± 0.04 | -              |
| 18  | 11           | 10.72 ± 0.13 | 10.98 ± 0.03   |
| 19  | 11           | 10.97 ± 0.05 | -              |
| 20  | 11           | 10.87 ± 0.09 | 11.02 ± 0.02   |
| 22  | 11           | 10.98 ± 0.03 | -              |
| 25  | 11           | 10.98 ± 0.04 | -              |

Values are averages (n=6) with standard deviation
