# Supplementary material for: Exploring the upper pH limits of nitrite oxidation: diversity, ecophysiology, and adaptive traits of haloalkalitolerant Nitrospira
Source: PubMed Central journal article supplement (PMC7784846; doi:10.1038/s41396-020-0724-1), 2020-07-24
Supplement: 41396_2020_724_MOESM13_ESM.pdf [file 41396_2020_724_MOESM13_ESM.pdf]

**Table S2** *Nitrospira* MAG statistics

| <b>Attribute</b>                                            | <b><i>Ca. Nitrospira alkalitolerans</i></b> | <b><i>Nitrospira sub-bin1*</i></b> | <b><i>Nitrospira sub-bin2*</i></b> |
|-------------------------------------------------------------|---------------------------------------------|------------------------------------|------------------------------------|
| Size (bp)                                                   | 4.894.714                                   | 957.413                            | 658.454                            |
| Completeness (%)                                            | 95.83                                       | 21.93                              | 0                                  |
| Contamination (%)                                           | 4.83                                        | 0                                  | 0                                  |
| DNA G + C (%)                                               | 51.4                                        | 51                                 | 51.5                               |
| DNA scaffolds                                               | 87                                          | 293                                | 217                                |
| Total genes                                                 | 5107                                        | 1142                               | 799                                |
| RNA genes                                                   | 35                                          | 3                                  | 90                                 |
| rRNA genes                                                  | 3                                           | 0                                  | 0                                  |
| tRNA genes                                                  | 47                                          | 8                                  | 8                                  |
| Amino acids encoded by tRNA genes (unique codons)           | 20 (46)                                     | 6 (8)                              | 5 (8)                              |
| <i>nxA genes (incl. Fragments)</i>                          | 3                                           | 4                                  | 3                                  |
| <i>nxB genes (incl. Fragments)</i>                          | 1                                           | 1                                  | 0                                  |
| Pairwise gANI value to “ <i>Ca. N. alkalitolerans</i> ” bin | 100                                         | 97.1                               | 95.2                               |
| Oneway gAAI value to “ <i>Ca. N. alkalitolerans</i> ” bin   | 99.9                                        | 94.3                               | 81.1                               |

\*original sub-bin, not re-assembled
