# Supplementary material for: Exploring the upper pH limits of nitrite oxidation: diversity, ecophysiology, and adaptive traits of haloalkalitolerant Nitrospira
Source: PubMed Central journal article supplement (PMC7784846; doi:10.1038/s41396-020-0724-1), 2020-07-24
Supplement: 41396_2020_724_MOESM14_ESM.pdf [file 41396_2020_724_MOESM14_ESM.pdf]

**Table S3**

Selected proteins of "Ca. Nitrospira alkalitolerans" with predicted functions in metabolic pathways and in adaptation to high alkalinity and salinity

| Central Carbon Metabolism      |                     |             |                                                                       |
|--------------------------------|---------------------|-------------|-----------------------------------------------------------------------|
| Glycogen formation/degradation | MaGe Identifier     | Gene        | Product                                                               |
|                                | NSPALKALI_v1_40047  | <i>glgX</i> | Glycogen debranching enzyme                                           |
|                                | NSPALKALI_v1_60125  | <i>glgX</i> | Glycogen debranching enzyme                                           |
|                                | NSPALKALI_v1_170014 | <i>glgX</i> | Putative Glycogen debranching enzyme                                  |
|                                | NSPALKALI_v1_40023  | <i>glgP</i> | Glycogen phosphorylase                                                |
|                                | NSPALKALI_v1_140097 | <i>glgP</i> | Glycogen phosphorylase                                                |
|                                | NSPALKALI_v1_60127  | <i>glgB</i> | 1,4-alpha-glucan branching enzyme                                     |
|                                | NSPALKALI_v1_60129  | <i>glgC</i> | Glucose-1-phosphate adenylyltransferase                               |
|                                | NSPALKALI_v1_240060 | <i>glgC</i> | Glucose-1-phosphate adenylyltransferase                               |
|                                | NSPALKALI_v1_60051  | <i>glgE</i> | Alpha-1,4-glucan:maltose-1-phosphate maltosyltransferase              |
|                                | NSPALKALI_v1_680007 | <i>pgm</i>  | Phosphoglucomutase                                                    |
|                                | NSPALKALI_v1_30082  | <i>glk</i>  | Glucokinase                                                           |
|                                | NSPALKALI_v1_120061 | <i>pgi</i>  | Glucosephosphate isomerase                                            |
|                                | NSPALKALI_v1_40085  | <i>malQ</i> | 4-alpha-glucanotransferase                                            |
|                                | NSPALKALI_v1_360024 | <i>rfbF</i> | Glucose-1-phosphate cytidylyltransferase                              |
|                                | NSPALKALI_v1_80165  |             | Amylo-alpha-1,6-glucosidase                                           |
| (r)TCA cycle                   | MaGe Identifier     | Gene        | Product                                                               |
|                                | NSPALKALI_v1_20059  | <i>aclB</i> | ATP-citrate lyase, beta subunit                                       |
|                                | NSPALKALI_v1_20060  | <i>aclA</i> | ATP citrate lyase, alpha subunit                                      |
|                                | NSPALKALI_v1_200042 | <i>forB</i> | 2-oxoglutarate:ferredoxin oxidoreductase, beta subunit                |
|                                | NSPALKALI_v1_200043 | <i>forC</i> | 2-oxoglutarate:ferredoxin oxidoreductase, gamma subunit               |
|                                | NSPALKALI_v1_200044 | <i>forE</i> | 2-oxoglutarate:ferredoxin oxidoreductase, epsilon subunit             |
|                                | NSPALKALI_v1_200045 | <i>forD</i> | 2-oxoglutarate:ferredoxin oxidoreductase, delta subunit               |
|                                | NSPALKALI_v1_200046 | <i>forA</i> | 2-oxoglutarate:ferredoxin oxidoreductase, alpha subunit               |
|                                | NSPALKALI_v1_20019  | <i>porD</i> | Pyruvate:ferredoxin oxidoreductase, delta subunit                     |
|                                | NSPALKALI_v1_20018  | <i>porC</i> | Pyruvate:ferredoxin oxidoreductase, gamma subunit                     |
|                                | NSPALKALI_v1_20017  | <i>porB</i> | Pyruvate:ferredoxin oxidoreductase, beta subunit                      |
|                                | NSPALKALI_v1_20016  | <i>porA</i> | Pyruvate:ferredoxin oxidoreductase, alpha subunit                     |
|                                | NSPALKALI_v1_20015  |             | CO dehydrogenase or Pyruvate:ferredoxin oxidoreductase, delta subunit |

|                            |                        |                   |                                                                                                             |
|----------------------------|------------------------|-------------------|-------------------------------------------------------------------------------------------------------------|
|                            | NSPALKALI_v1_510019    | <i>sdhA/ nadB</i> | Succinate dehydrogenase/fumarate reductase, flavoprotein subunit or L-aspartate oxidase                     |
|                            | NSPALKALI_v1_20130     | <i>sdhA/ nadB</i> | Succinate dehydrogenase/fumarate reductase, flavoprotein subunit or L-aspartate oxidase                     |
|                            | NSPALKALI_v1_200063    | <i>sdhA/ nadB</i> | Succinate dehydrogenase/fumarate reductase, flavoprotein subunit or L-aspartate oxidase                     |
|                            | NSPALKALI_v1_510021    | <i>sdhC</i>       | Succinate dehydrogenase, subunit C (fragment)                                                               |
|                            | NSPALKALI_v1_510020    | <i>sdhB</i>       | Succinate dehydrogenase/ fumarate reductase iron-sulfur protein                                             |
|                            | NSPALKALI_v1_510018    | <i>gltA</i>       | Citrate synthase                                                                                            |
|                            | NSPALKALI_v1_750005    | <i>gltA</i>       | Citrate synthase 2                                                                                          |
|                            | NSPALKALI_v1_170072    | <i>sucA</i>       | Pyruvate/2-oxoglutarate dehydrogenase complex,dehydrogenase (E1) component, eukaryotic type, alpha subunit  |
|                            | NSPALKALI_v1_190028    |                   | Pyruvate/2-oxoglutarate dehydrogenase complex, dehydrogenase (E1) component, eukaryotic type, alpha subunit |
|                            | NSPALKALI_v1_170073    | <i>sucB</i>       | Pyruvate/2-oxoglutarate dehydrogenase complex,dehydrogenase (E1) component, eukaryotic type, beta subunit   |
|                            | NSPALKALI_v1_20057     | <i>icd</i>        | Fragment of isocitrate dehydrogenase                                                                        |
|                            | NSPALKALI_v1_40102     | <i>icd</i>        | Putative isocitrate dehydrogenase (NADP)                                                                    |
|                            | NSPALKALI_v1_40103     | <i>icd</i>        | Isocitrate dehydrogenase (NAD+)                                                                             |
|                            | NSPALKALI_v1_100028    | <i>fumC</i>       | Fumarate hydratase (fumarase C),aerobic Class II                                                            |
|                            | NSPALKALI_v1_580009    | <i>mdh</i>        | Malate dehydrogenase                                                                                        |
|                            | NSPALKALI_v1_200065    | <i>sucC</i>       | Succinyl-CoA ligase [ADP-forming], subunit alpha                                                            |
|                            | NSPALKALI_v1_200064    | <i>sucD</i>       | Succinyl-CoA ligase [ADP-forming] subunit beta                                                              |
|                            | NSPALKALI_v1_200061    | <i>acnA</i>       | aconitate hydratase 1                                                                                       |
|                            | NSPALKALI_v1_90082     | <i>lpdA</i>       | 2-oxo-acid dehydrogenase complex, Dihydrolipoamide dehydrogenase (E3) (fragment)                            |
| <b>Carbonate uptake</b>    | <b>MaGe Identifier</b> | <b>Gene</b>       | <b>Product</b>                                                                                              |
|                            | NSPALKALI_v1_30038     | <i>bicA</i>       | Bicarbonate transporter BicA or sulfate permease                                                            |
|                            | NSPALKALI_v1_40075     | <i>bicA</i>       | Bicarbonate transporter BicA or sulfate permease                                                            |
|                            | NSPALKALI_v1_120088    |                   | Carbonic anhydase                                                                                           |
|                            | NSPALKALI_v1_550019    |                   | Carbonic anhydase                                                                                           |
| <b>Hydrogen Metabolism</b> |                        |                   |                                                                                                             |
| <b>Hydrogen Metabolism</b> | <b>MaGe Identifier</b> | <b>Gene</b>       | <b>Product</b>                                                                                              |
|                            | NSPALKALI_v1_490036    |                   | Putative (NiFe) hydrogenase, beta subunit (group 3b)                                                        |
|                            | NSPALKALI_v1_160002    |                   | Nickel-dependent hydrogenase, large subunit (group 3b)                                                      |
|                            | NSPALKALI_v1_500001    |                   | Hydrogenase transcriptional regulatory protein HoxA                                                         |
|                            | NSPALKALI_v1_500003    |                   | Ni,Fe-hydrogenase, small subunit (group 2a)                                                                 |
|                            | NSPALKALI_v1_500004    |                   | Ni,Fe-hydrogenase, large subunit (group 2a)                                                                 |
|                            | NSPALKALI_v1_500007    |                   | Hydrogenase maturation protein (fragment)                                                                   |
|                            | NSPALKALI_v1_500014    | <i>hypF</i>       | Hydrogenase maturation protein                                                                              |
|                            | NSPALKALI_v1_500015    | <i>hypC</i>       | Hydrogenase assembly chaperone protein                                                                      |

|                           |                        |               |                                                   |
|---------------------------|------------------------|---------------|---------------------------------------------------|
|                           | NSPALKALI_v1_500017    | <i>hypD</i>   | hydrogenase expression/ formation protein         |
|                           | NSPALKALI_v1_500018    | <i>hypE</i>   | hydrogenase expression/ formation protein         |
|                           | NSPALKALI_v1_500020    | <i>hypA</i>   | putative hydrogenase nickel incorporation protein |
|                           | NSPALKALI_v1_500021    | <i>hypB</i>   | hydrogenase accessory protein                     |
| <b>Nitrite Metabolism</b> |                        |               |                                                   |
| <b>Nitrite oxidation</b>  | <b>MaGe Identifier</b> | <b>Gene</b>   | <b>Product</b>                                    |
|                           | NSPALKALI_v1_140038    | <i>nxrB</i>   | Nitrite oxidoreductase beta subunit               |
|                           | NSPALKALI_v1_140037    | <i>nxrA</i>   | Nitrite oxidoreductase alpha subunit              |
|                           | NSPALKALI_v1_530013    | <i>nxrA</i>   | Nitrite oxidoreductase alpha subunit              |
|                           | NSPALKALI_v1_530020    | <i>nxrA</i>   | Nitrite oxidoreductase alpha subunit (fragment)   |
|                           | NSPALKALI_v1_150108    | <i>nxrC</i>   | Putative nitrite oxidoreductase, gamma subunit    |
|                           | NSPALKALI_v1_70126     | <i>nxrC</i>   | Nitrite oxidoreductase gamma subunit              |
|                           | NSPALKALI_v1_70134     | <i>nxrC</i>   | Nitrite oxidoreductase gamma subunit              |
| <b>Respiratory Chain</b>  |                        |               |                                                   |
| <b>Complex I</b>          | <b>MaGe Identifier</b> | <b>Gene</b>   | <b>Product</b>                                    |
|                           | NSPALKALI_v1_400013    | <i>nuoA</i>   | NADH-quinone oxidoreductase subunit A             |
|                           | NSPALKALI_v1_400014    | <i>nuoB</i>   | NADH-quinone oxidoreductase subunit B             |
|                           | NSPALKALI_v1_400015    | <i>nuoC/D</i> | NADH-quinone oxidoreductase subunit C/D           |
|                           | NSPALKALI_v1_400016    | <i>nuoE</i>   | NADH-quinone oxidoreductase subunit E             |
|                           | NSPALKALI_v1_400017    | <i>nuoF</i>   | NADH-quinone oxidoreductase, subunit F            |
|                           | NSPALKALI_v1_400018    | <i>nuoG</i>   | NADH-quinone oxidoreductase, subunitG             |
|                           | NSPALKALI_v1_400019    | <i>nuoH</i>   | NADH-quinone oxidoreductase subunit H             |
|                           | NSPALKALI_v1_400020    | <i>nuoI</i>   | NADH-quinone oxidoreductase subunit I             |
|                           | NSPALKALI_v1_400021    | <i>nuoJ</i>   | NADH-quinone oxidoreductase, membrane subunit J   |
|                           | NSPALKALI_v1_400022    | <i>nuoK</i>   | NADH-quinone oxidoreductase subunit K             |
|                           | NSPALKALI_v1_400023    | <i>nuoL</i>   | NADH-quinone oxidoreductase, membrane subunit L   |
|                           | NSPALKALI_v1_400024    | <i>nuoM</i>   | NADH-quinone oxidoreductase subunit M             |
|                           | NSPALKALI_v1_400025    | <i>nuoN</i>   | NADH-quinone oxidoreductase subunit N2            |
|                           | NSPALKALI_v1_250014    | <i>nuoA</i>   | NADH-quinone oxidoreductase subunit A             |
|                           | NSPALKALI_v1_250015    | <i>nuoB</i>   | NADH-quinone oxidoreductase subunit B             |
|                           | NSPALKALI_v1_250016    | <i>nuoC</i>   | NADH-quinone oxidoreductase subunit C             |
|                           | NSPALKALI_v1_250017    | <i>nuoD</i>   | NADH-quinone oxidoreductase subunit D             |
|                           | NSPALKALI_v1_250018    | <i>nuoG</i>   | NADH-quinone oxidoreductase, subunitG             |
|                           | NSPALKALI_v1_250019    | <i>nuoI</i>   | NADH-quinone oxidoreductase subunit I             |

|                    |                        |                   |                                                                                                          |
|--------------------|------------------------|-------------------|----------------------------------------------------------------------------------------------------------|
|                    | NSPALKALI_v1_250020    | <i>nuoJ</i>       | NADH-quinone oxidoreductase, membrane subunit J                                                          |
|                    | NSPALKALI_v1_250021    | <i>nuoK</i>       | NADH-quinone oxidoreductase subunit K                                                                    |
|                    | NSPALKALI_v1_250022    | <i>nuoL</i>       | NADH-quinone oxidoreductase, membrane subunit L                                                          |
|                    | NSPALKALI_v1_250023    | <i>nuoM</i>       | NADH-quinone oxidoreductase, membrane subunit M                                                          |
|                    | NSPALKALI_v1_250024    | <i>nuoM</i>       | NADH-quinone oxidoreductase, membrane subunit M                                                          |
|                    | NSPALKALI_v1_250025    | <i>nuoN</i>       | NADH-quinone oxidoreductase subunit N                                                                    |
|                    | NSPALKALI_v1_580010    | <i>nuoF</i>       | NADH-quinone oxidoreductase subunit F 2                                                                  |
| <b>Complex II</b>  | <b>MaGe Identifier</b> | <b>Gene</b>       | <b>Product</b>                                                                                           |
|                    | NSPALKALI_v1_510019    | <i>sdhA/ nadB</i> | Succinate dehydrogenase/fumarate reductase, flavoprotein subunit or L-aspartate oxidase                  |
|                    | NSPALKALI_v1_510020    | <i>sdhB</i>       | Succinate dehydrogenase/ fumarate reductase iron-sulfur protein                                          |
|                    | NSPALKALI_v1_510021    | <i>sdhC</i>       | Succinate dehydrogenase, subunit C (fragment)                                                            |
|                    | NSPALKALI_v1_20130     | <i>sdhA/ nadB</i> | Succinate dehydrogenase/fumarate reductase, flavoprotein subunit or L-aspartate oxidase                  |
|                    | NSPALKALI_v1_200063    | <i>sdhA/ nadB</i> | Succinate dehydrogenase/fumarate reductase, flavoprotein subunit or L-aspartate oxidase                  |
| <b>Complex III</b> | <b>MaGe Identifier</b> | <b>Gene</b>       | <b>Product</b>                                                                                           |
|                    | NSPALKALI_v1_150103    |                   | Putative Quinol-cytochrome c reductase, cytochrome b subunit                                             |
|                    | NSPALKALI_v1_150102    |                   | Putative Quinol-cytochrome c reductase, iron-sulfur subunit, modulated with PRC-barrel (Modular protein) |
|                    | NSPALKALI_v1_370011    |                   | Menaquinol-cytochrome c reductase cytochrome b subunit                                                   |
|                    | NSPALKALI_v1_370010    |                   | Putative Quinol-cytochrome c reductase, iron-sulfur subunit (Rieske iron-sulfur protein)                 |
| <b>Complex IV</b>  | <b>MaGe Identifier</b> | <b>Gene</b>       | <b>Product</b>                                                                                           |
|                    | NSPALKALI_v1_150105    |                   | Putative Cytochrome bd-type quinol oxidase subunit 1                                                     |
|                    | NSPALKALI_v1_530011    |                   | Putative Cytochrome bd-type quinol oxidase, subunit 1                                                    |
|                    | NSPALKALI_v1_70108     |                   | Cytochrome bd ubiquinol oxidase subunit I                                                                |
|                    | NSPALKALI_v1_220083    |                   | Putative Cytochrome bd ubiquinol oxidase, subunit I                                                      |
|                    | NSPALKALI_v1_220084    |                   | Putative Cytochrome bd ubiquinol oxidase, subunit II                                                     |
| <b>Complex V</b>   | <b>MaGe Identifier</b> | <b>Gene</b>       | <b>Product</b>                                                                                           |
|                    | NSPALKALI_v1_10079     | <i>atpH</i>       | ATP synthase subunit delta                                                                               |
|                    | NSPALKALI_v1_10080     | <i>atpA</i>       | F1 sector of membrane-bound ATP synthase, alpha subunit                                                  |
|                    | NSPALKALI_v1_10081     | <i>atpD</i>       | Membrane-bound ATP synthase , F1 sector, beta-subunit                                                    |
|                    | NSPALKALI_v1_10082     | <i>atpC</i>       | ATP synthase epsilon chain                                                                               |
|                    | NSPALKALI_v1_790004    | <i>atpA</i>       | ATP synthase subunit alpha 2                                                                             |
|                    | NSPALKALI_v1_20126     | <i>atpI</i>       | Putative ATP synthase F0, subunit I                                                                      |
|                    | NSPALKALI_v1_20125     | <i>atpB</i>       | ATP synthase subunit a                                                                                   |
|                    | NSPALKALI_v1_20124     | <i>atpE</i>       | ATP synthase subunit c                                                                                   |
|                    | NSPALKALI_v1_20123     | <i>atpF</i>       | ATP synthase subunit b                                                                                   |

|                                |                        |                   |                                                           |
|--------------------------------|------------------------|-------------------|-----------------------------------------------------------|
|                                | NSPALKALI_v1_120045    | <i>atpG</i>       | ATP synthase gamma chain                                  |
|                                | NSPALKALI_v1_330007    | <i>atpG</i>       | ATP synthase gamma chain                                  |
|                                | NSPALKALI_v1_10070     | <i>yidC</i>       | Membrane protein insertase YidC                           |
| <b>Iron uptake and storage</b> |                        |                   |                                                           |
|                                | <b>MaGe Identifier</b> | <b>Gene</b>       | <b>Product</b>                                            |
|                                | NSPALKALI_v1_170059    |                   | Bacterioferritin (modular protein)                        |
|                                | NSPALKALI_v1_60072     |                   | Bacterioferritin, iron storage and detoxification protein |
|                                | NSPALKALI_v1_80012     | <i>fecE</i>       | Iron-dicitrate transporter                                |
|                                | NSPALKALI_v1_110032    | <i>fur</i>        | Ferric uptake regulation protein                          |
|                                | NSPALKALI_v1_10210     | <i>fur</i>        | Ferric uptake regulation protein                          |
|                                | NSPALKALI_v1_58005     |                   | putative Bacterioferritin-associated ferredoxin           |
|                                | NSPALKALI_v1_460022    |                   | putative TonB-dependent receptor                          |
|                                | NSPALKALI_v1_250054    |                   | putative TonB-dependent receptor                          |
|                                | NSPALKALI_v1_570021    |                   | putative TonB-dependent receptor                          |
|                                | NSPALKALI_v1_110038    |                   | putative TonB-dependent receptor                          |
|                                | NSPALKALI_v1_340011    |                   | putative TonB-dependent receptor                          |
|                                | NSPALKALI_v1_400004    |                   | putative Protein tonB2                                    |
|                                | NSPALKALI_v1_400007    | <i>exbB</i>       | Biopolymer transport protein                              |
|                                | NSPALKALI_v1_570025    | <i>exbD</i>       | Biopolymer transport protein                              |
|                                | NSPALKALI_v1_570024    | <i>exbD</i>       | Biopolymer transport protein                              |
|                                | NSPALKALI_v1_140114    | <i>exbD</i>       | Biopolymer transport protein                              |
| <b>Flagellum biosynthesis</b>  |                        |                   |                                                           |
| <b>Flagellum assembly</b>      | <b>MaGe Identifier</b> | <b>Gene</b>       | <b>Product</b>                                            |
|                                | NSPALKALI_v1_190007    | <i>motA</i>       | Flagellar motor protein MotA                              |
|                                | NSPALKALI_v1_190008    | <i>motB</i>       | Flagellar motor protein MotB                              |
|                                | NSPALKALI_v1_140115    |                   | MotA/TolQ/ExbB proton channel family protein              |
|                                | NSPALKALI_v1_30036     | <i>ompA/ motB</i> | putative OmpA/MotB                                        |
| <b>K<sup>+</sup> transport</b> |                        |                   |                                                           |
| <b>K<sup>+</sup> uptake</b>    | <b>MaGe Identifier</b> | <b>Gene</b>       | <b>Product</b>                                            |
|                                | NSPALKALI_v1_150036    |                   | putative potassium channel NAD-binding component          |
|                                | NSPALKALI_v1_270047    | <i>trkC</i>       | Trk system potassium uptake protein C                     |
|                                | NSPALKALI_v1_170093    | <i>trkB</i>       | Trk system potassium uptake protein B                     |
|                                | NSPALKALI_v1_100131    | <i>trkB</i>       | Trk system potassium uptake protein B                     |
| <b>K<sup>+</sup> efflux</b>    | <b>MaGe Identifier</b> | <b>Gene</b>       | <b>Product</b>                                            |

|                                               |                        |                      |                                                                                                                   |
|-----------------------------------------------|------------------------|----------------------|-------------------------------------------------------------------------------------------------------------------|
|                                               | NSPALKALI_v1_160038    | <i>kefB</i>          | putative K(+) efflux antiporter KefB                                                                              |
|                                               | NSPALKALI_v1_30114     | <i>kefB</i>          | Putative Glutathione-regulated potassium-efflux system                                                            |
|                                               | NSPALKALI_v1_30115     | <i>kefB</i>          | Putative Glutathione-regulated potassium-efflux system                                                            |
| <b>Na<sup>+</sup> transport</b>               |                        |                      |                                                                                                                   |
| <b>Sodium import</b>                          | <b>MaGe Identifier</b> | <b>Gene</b>          | <b>Product</b>                                                                                                    |
|                                               | NSPALKALI_v1_50050     |                      | Sodium/solute symporter, putative (fragment)                                                                      |
|                                               | NSPALKALI_v1_140059    |                      | Sodium:dicarboxylate symporter                                                                                    |
|                                               | NSPALKALI_v1_150072    |                      | Uncharacterized sodium-dependent transporter YhdH                                                                 |
|                                               | NSPALKALI_v1_110138    | <i>agcS</i>          | Sodium/alanine symporter                                                                                          |
|                                               | NSPALKALI_v1_30038     | <i>bicA</i>          | Bicarbonate transporter BicA or sulfate permease                                                                  |
|                                               | NSPALKALI_v1_40075     | <i>bicA</i>          | Bicarbonate transporter BicA or sulfate permease                                                                  |
| <b>Sodium/ cation exchange</b>                | <b>MaGe Identifier</b> | <b>Gene</b>          | <b>Product</b>                                                                                                    |
|                                               | NSPALKALI_v1_380014    |                      | Sodium/calcium exchanger                                                                                          |
|                                               | NSPALKALI_v1_90107     | <i>nhaA</i>          | sodium:proton antiporter                                                                                          |
|                                               | NSPALKALI_v1_30009     | <i>nhaB</i>          | fragment of sodium:proton antiporter (part 2)                                                                     |
|                                               | NSPALKALI_v1_30007     | <i>nhaB</i>          | fragment of sodium:proton antiporter (part 1)                                                                     |
|                                               | NSPALKALI_v1_30027     | <i>mrpE</i>          | putative Monovalent cation/H <sup>+</sup> antiporter, subunit E                                                   |
|                                               | NSPALKALI_v1_30028     | <i>mrpF</i>          | putative Monovalent cation/H <sup>+</sup> antiporter, subunit F                                                   |
|                                               | NSPALKALI_v1_30029     | <i>mrpG</i>          | putative Monovalent cation/H <sup>+</sup> antiporter, subunit G                                                   |
|                                               | NSPALKALI_v1_30030     | <i>mrpA</i>          | putative Monovalent cation/H <sup>+</sup> antiporter, subunit A (Fragment, part 3)                                |
|                                               | NSPALKALI_v1_30031     | <i>mrpB</i>          | putative Monovalent cation/H <sup>+</sup> antiporter, subunit B                                                   |
|                                               | NSPALKALI_v1_30032     | <i>mrpC</i>          | putative Monovalent cation/H <sup>+</sup> antiporter, subunit C                                                   |
|                                               | NSPALKALI_v1_30033     | <i>mrpD</i>          | putative Monovalent cation/H <sup>+</sup> antiporter, subunit D                                                   |
|                                               | NSPALKALI_v1_30034     | <i>mrpA/D (nuoL)</i> | putative Monovalent cation/H <sup>+</sup> antiporter, subunit A or D                                              |
|                                               | NSPALKALI_v1_30035     | <i>mrpA/D (nuoM)</i> | putative Monovalent cation/H <sup>+</sup> antiporter, subunit A or D                                              |
|                                               | NSPALKALI_v1_30037     | <i>nhaB</i>          | sodium:proton antiporter                                                                                          |
|                                               | NSPALKALI_v1_40053     | <i>mrpD</i>          | putative Monovalent cation/H <sup>+</sup> antiporter, subunit D                                                   |
|                                               | NSPALKALI_v1_40054     | <i>mrpC</i>          | putative Monovalent cation/H <sup>+</sup> antiporter, subunit C                                                   |
|                                               | NSPALKALI_v1_40055     | <i>mrpB</i>          | putative Monovalent cation/H <sup>+</sup> antiporter, subunit B                                                   |
|                                               | NSPALKALI_v1_40056     | <i>mrpA/B</i>        | putative Monovalent cation/H <sup>+</sup> antiporter, subunit A or B                                              |
|                                               | NSPALKALI_v1_40057     | <i>mrpG/ phaG</i>    | Monovalent cation/proton antiporter, MnhG/PhaG subunit                                                            |
|                                               | NSPALKALI_v1_40058     | <i>mrpF</i>          | putative Monovalent cation/H <sup>+</sup> antiporter, subunit F (Multiple resistance and pH regulation protein F) |
|                                               | NSPALKALI_v1_40059     | <i>mrpE</i>          | putative Monovalent cation/H <sup>+</sup> antiporter, subunit E                                                   |
| <b>Na<sup>+</sup> translocating complex I</b> |                        |                      |                                                                                                                   |

| Alternative complex I       | MaGe Identifier     | Gene         | Product                                                                  |
|-----------------------------|---------------------|--------------|--------------------------------------------------------------------------|
|                             | NSPALKALI_v1_330010 | <i>nqrA</i>  | Na(+)-translocating NADH-quinone reductase subunit A                     |
|                             | NSPALKALI_v1_330011 | <i>nqrB</i>  | Na(+)-translocating NADH-quinone reductase subunit B                     |
|                             | NSPALKALI_v1_330013 | <i>nqrC</i>  | Na(+)-translocating NADH-quinone reductase subunit C                     |
|                             | NSPALKALI_v1_330014 | <i>nqrD</i>  | Na(+)-translocating NADH-quinone reductase subunit D                     |
|                             | NSPALKALI_v1_330015 | <i>nqrE</i>  | Na(+)-translocating NADH-quinone reductase subunit E                     |
|                             | NSPALKALI_v1_330016 | <i>nqrF</i>  | Na(+)-translocating NADH-quinone reductase subunit F                     |
| <b>cbb3-type complex IV</b> |                     |              |                                                                          |
| Alternative complex IV      | MaGe Identifier     | Gene         | Product                                                                  |
|                             | NSPALKALI_v1_40069  |              | Putative Cytochrome c oxidase (cbb3-type), fused subunits I, II, and III |
| <b>N-type ATPase</b>        |                     |              |                                                                          |
| Alternative Complex V       | MaGe Identifier     | Gene         | Product                                                                  |
|                             | NSPALKALI_v1_440034 | <i>atpD</i>  | ATP synthase subunit beta                                                |
|                             | NSPALKALI_v1_440035 | <i>atpC</i>  | H(+)-transporting ATP synthase, subunit epsilon                          |
|                             | NSPALKALI_v1_440036 | <i>atpQ</i>  | H(+)-transporting ATP synthase subunit q                                 |
|                             | NSPALKALI_v1_440037 | <i>atpR</i>  | F1/F0 ATPase, Methanosarcina type, subunit r                             |
|                             | NSPALKALI_v1_440038 | <i>atpB</i>  | ATP synthase subunit a                                                   |
|                             | NSPALKALI_v1_790001 | <i>atpB</i>  | ATP synthase subunit a                                                   |
|                             | NSPALKALI_v1_790002 | <i>atpE</i>  | ATP synthase subunit c 2                                                 |
|                             | NSPALKALI_v1_790003 | <i>atpF</i>  | ATP synthase subunit b 2                                                 |
|                             | NSPALKALI_v1_790004 | <i>atpA</i>  | ATP synthase subunit alpha 2                                             |
|                             | NSPALKALI_v1_330002 | <i>atpG</i>  | ATP synthase subunit gamma                                               |
| <b>Osmoprotectants</b>      |                     |              |                                                                          |
| Glutamate synthesis         | MaGe Identifier     | Gene         | Product                                                                  |
|                             | NSPALKALI_v1_70075  | <i>gltB</i>  | Glutamate synthase [NADPH], large subunit                                |
|                             | NSPALKALI_v1_70076  | <i>gltD</i>  | Glutamate synthase [NADPH], small chain                                  |
|                             | NSPALKALI_v1_140012 | <i>glt</i>   | Putative glutamate synthase (Zinc finger CDGSH-type domain protein)      |
|                             | NSPALKALI_v1_40009  | <i>glt</i>   | Putative glutamate synthase (Zinc finger CDGSH-type domain protein)      |
| Glycine betaine import      | MaGe Identifier     | Gene         | Product                                                                  |
|                             | NSPALKALI_v1_140025 | <i>opuD</i>  | Glycine betaine transporter                                              |
|                             | NSPALKALI_v1_20246  | <i>opuCB</i> | ABC-type glycine betaine transport, periplasmic subunit                  |
| Trehalose synthesis         | MaGe Identifier     | Gene         | Product                                                                  |
|                             | NSPALKALI_v1_60049  | <i>treS</i>  | Trehalose synthase                                                       |
| <b>Other</b>                |                     |              |                                                                          |

| Pathway              | MaGe Identifier     | Gene             | Product                                |
|----------------------|---------------------|------------------|----------------------------------------|
| Membrane adaptation  | NSPALKALI_v1_490030 | <i>cls</i>       | Cardiolipin synthase                   |
| Arsenical resistance | NSPALKALI_v1_370005 | <i>arsB/acr3</i> | Arsenite efflux pump ArsB, ACR3 family |
